# Supplementary material for: Ionically cross-linked PEDOT:PSS as a multi-functional conductive binder for high-performance lithium–sulfur batteries
Source: Royal Society of Chemistry journal article supplement (doi:10.1039/c8se00167g), 2018-01-01
Supplement: c8se00167g1.pdf [file c8se00167g1.pdf]

## Supplementary Information

### **Ionicly cross-linked PEDOT:PSS as a multi-functional conductive binder for high-performance lithium-sulfur battery**

Longlong Yan,<sup>a,b,†</sup> Xiguang Gao,<sup>a,†</sup> Joseph Palathinkal Thomas,<sup>c,a</sup> Jenner Ngai,<sup>a</sup> Haig Altounian,<sup>a</sup> Kam Tong Leung,<sup>c</sup> Yuezhong Meng<sup>b,\*</sup> and Yuning Li<sup>a,\*</sup>

<sup>a</sup> *Department of Chemical Engineering and Waterloo Institute for Nanotechnology (WIN) University of Waterloo, 200 University Ave West, Waterloo, Ontario, Canada, N2L 3G1. [yuning.li@uwaterloo.ca](mailto:yuning.li@uwaterloo.ca); Tel: 1-519-888-4567 ext. 31105; Fax: 1-519-888-4347*

<sup>b</sup> *The Key Laboratory of Low-Carbon Chemistry & Energy Conservation of Guangdong Province/State Key Laboratory of Optoelectronic Materials and Technologies, School of Materials Science and Engineering, Sun Yat-sen University, Guangzhou 510275, P. R. China. E-mail: [mengyzh@sysu.edu.cn](mailto:mengyzh@sysu.edu.cn)*

<sup>c</sup> *Department of Chemistry, University of Waterloo, 200 University Ave West, Waterloo, Ontario, Canada, N2L 3G1.*

†These authors contributed equally to this work.

**Table S1.** Sulfur weight losses of cathode materials after Soxhlet extraction with CS<sub>2</sub>.<sup>a</sup>

| Sample                                         | Weight                    |                              | Total weight loss | Sulfur weight loss |
|------------------------------------------------|---------------------------|------------------------------|-------------------|--------------------|
|                                                | Before Soxhlet extraction | After 5 h Soxhlet extraction |                   |                    |
| 70% NPS/20%SP/10%PVDF                          | 1.0000g                   | 0.2980g                      | 70%               | 100%               |
| 70% NPS/20%SP/10%<br>PEDOT:PSS                 | 1.0004g                   | 0.2998g                      | 70%               | 100%               |
| 70%NPS/20%SP/10%PEDOT:PSS<br>-Mg <sup>2+</sup> | 1.0010g                   | 0.3984g                      | 60%               | 86%                |

<sup>a</sup>The Soxhlet extraction setup used to dissolve sulfur in the S/SP/binder composites is shown below.

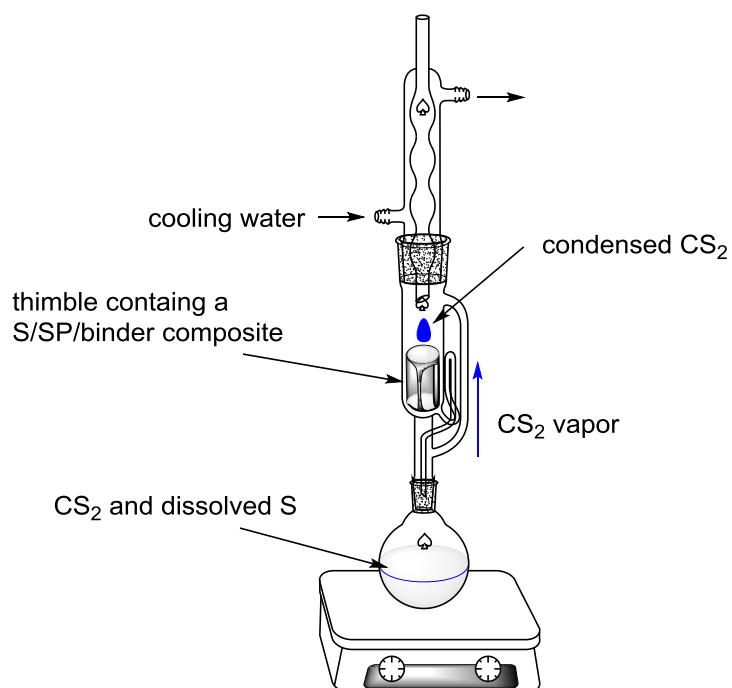

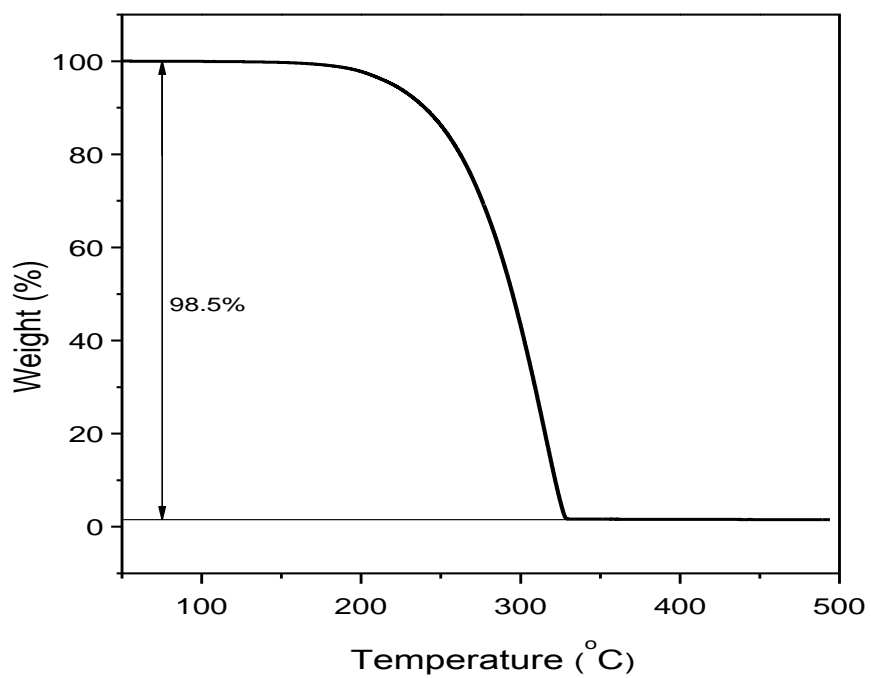

**Figure S1.** Thermogravimetric analysis (TGA) of NPS at a heating rate of  $20\text{ }^{\circ}\text{C min}^{-1}$  under nitrogen.

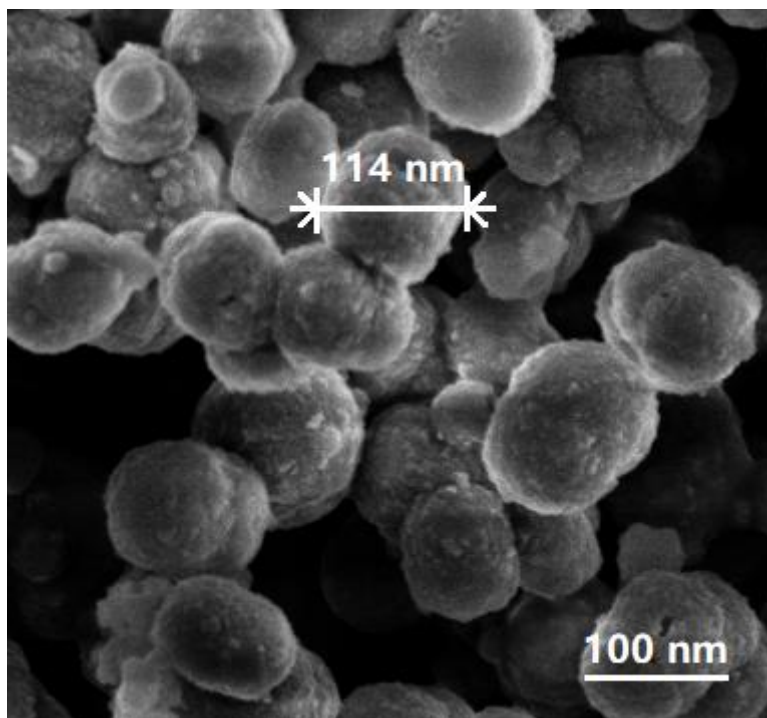

**Figure S2.** SEM images of nanoparticulate sulfur (NPS).
